# Supplementary material for: Prediction of Recurrent Mutations in SARS-CoV-2 Using Artificial Neural Networks
Source: MDPI journal article supplement (doi:10.3390/ijms232314683), 2022-11-24
Supplement: s1 [file s1]

## **Supplementary Information for Prediction of recurrent mutations in SARS-CoV-2 using artificial neural networks.**

Bryan Saldivar-Espinoza,<sup>1</sup> Guillem Macip,<sup>1</sup> Pol Garcia-Segura,<sup>1</sup> Júlia Mestres-Truyol,<sup>1</sup> Pere Puigbò,<sup>2,3,4</sup> Adrià Cereto-Massagué,<sup>5</sup> Gerard Pujadas,<sup>1\*</sup> and Santiago Garcia-Vallve<sup>1\*</sup>

<sup>1</sup> Departament de Bioquímica i Biotecnologia, Research group in Cheminformatics & Nutrition, Campus de Sescelades, Universitat Rovira i Virgili, 43007 Tarragona, Catalonia, Spain.

<sup>2</sup> Department of Biology, University of Turku, 20500 Turku, Finland.

<sup>3</sup> Department of Biochemistry and Biotechnology, Rovira i Virgili University, 43007 Tarragona, Catalonia, Spain.

<sup>4</sup> Nutrition and Health Unit, Eurecat Technology Centre of Catalonia, 43204 Reus, Catalonia, Spain

<sup>5</sup> EURECAT Centre Tecnològic de Catalunya, Centre for Omic Sciences (COS), Joint Unit Universitat Rovira i Virgili-EURECAT, Unique Scientific and Technical Infrastructures (ICTS)

\*Correspondence: Santiago Garcia-Vallve

**Email:** santi.garcia-vallve@urv.cat (S.G.-V.)

### **This PDF file includes:**

Figures S1 to S11

Tables S1 to S6

### **Other supplementary materials for this manuscript include the following:**

Dataset S1 is in the file SI\_Datasets.xlsx

# Figure S1. Recurrent mutation changes at nucleotide level per Number of Distantly-Related Lineages thresholds (NDRL).

This plot shows each nucleotide change divided by the total number of mutations per NDRL thresholds. Each column adds up to 100%. The horizontal axis include in parentheses the number of total mutations per each considered threshold.

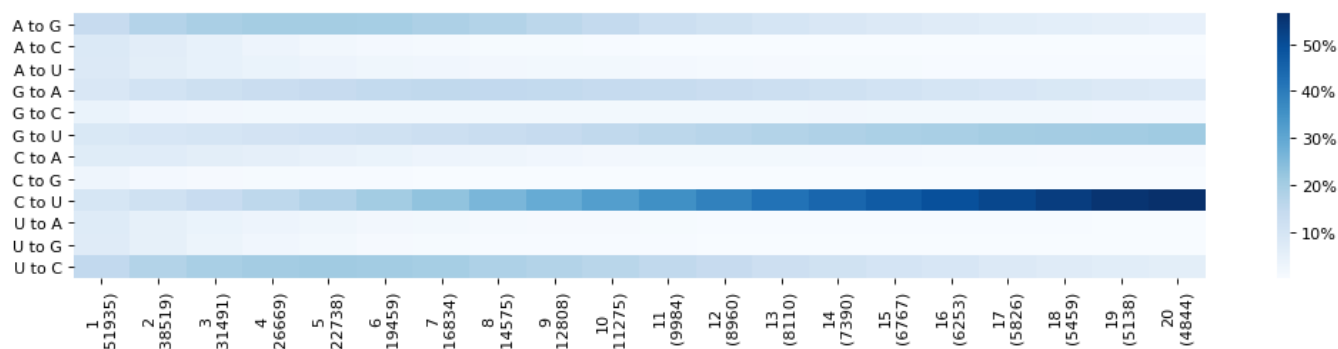

**Figure S2. Number of mutations per number of nucleotides per gene across training, validation and testing set.**

*This plot shows the genes used in the training set (in blue), validation set (in orange) and testing set (in green). They are sorted from left to right so the gene with the highest number of mutations per nucleotide is on the left.*

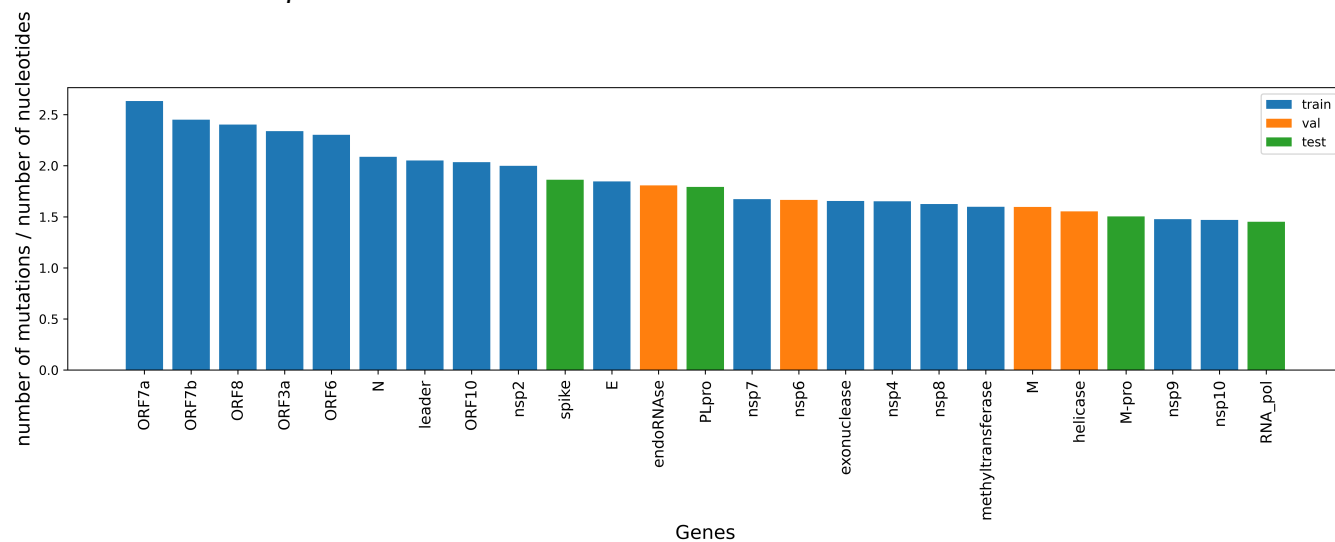

### Figure S3. Mutations per set.

The columns from left to right are training, validation and testing. The plot shows the nucleotide change normalized per column, each column adds up to 100%.

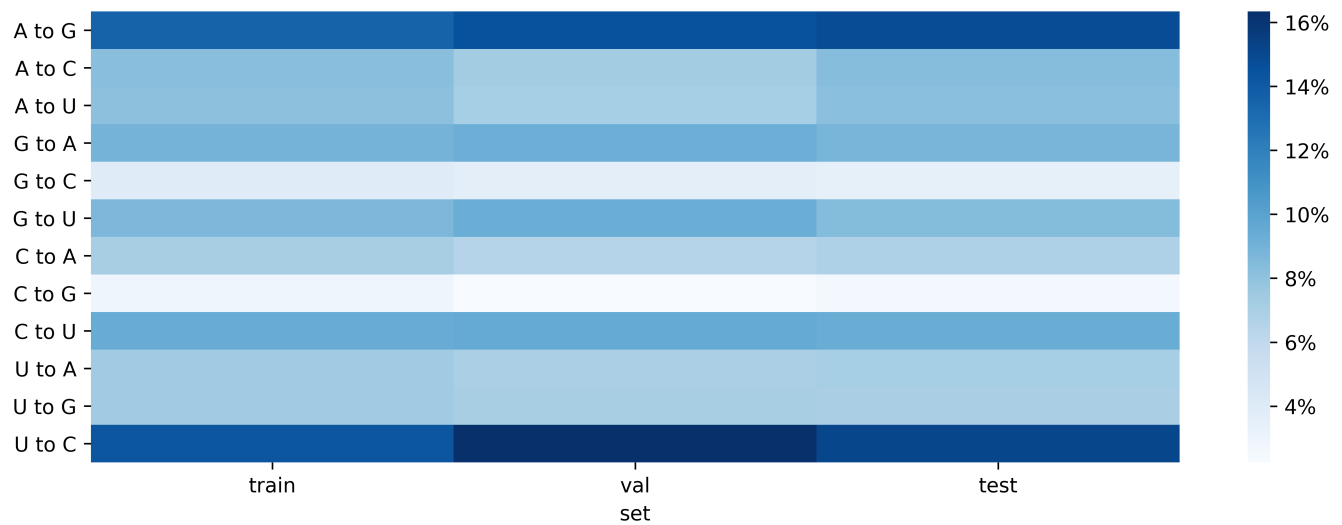

**Figure S4. Receiver Operating Characteristic (ROC) curve of the testing set genes using 1 (panel A), 5 (panel B), 10 (panel C) and 15 (panel D) as thresholds for the NDRL.**

The subplots A, B, C and D correspond, respectively, to the NDRL thresholds of 1, 5, 10 and 15. Orange, green, red and purple lines correspond, respectively, to the Mpro, spike, PLpro and RNA\_pol genes. The horizontal axis corresponds to the False Positive rate and the vertical axis to the True Positive rate. The values for the area under the curve (AUC) for a perfect prediction and for a random prediction are 1.0 and 0.5 respectively. The AUC for the genes M-pro, Spike, PLpro, RNA\_pol are 0.73, 0.73, 0.76, 0.72 with the threshold 1; 0.79, 0.76, 0.77 and 0.8 with the threshold 5, 0.79, 0.71, 0.78, and 0.8 with the threshold 10 and 0.82, 0.75, 0.83 and 0.82 with the threshold 15.

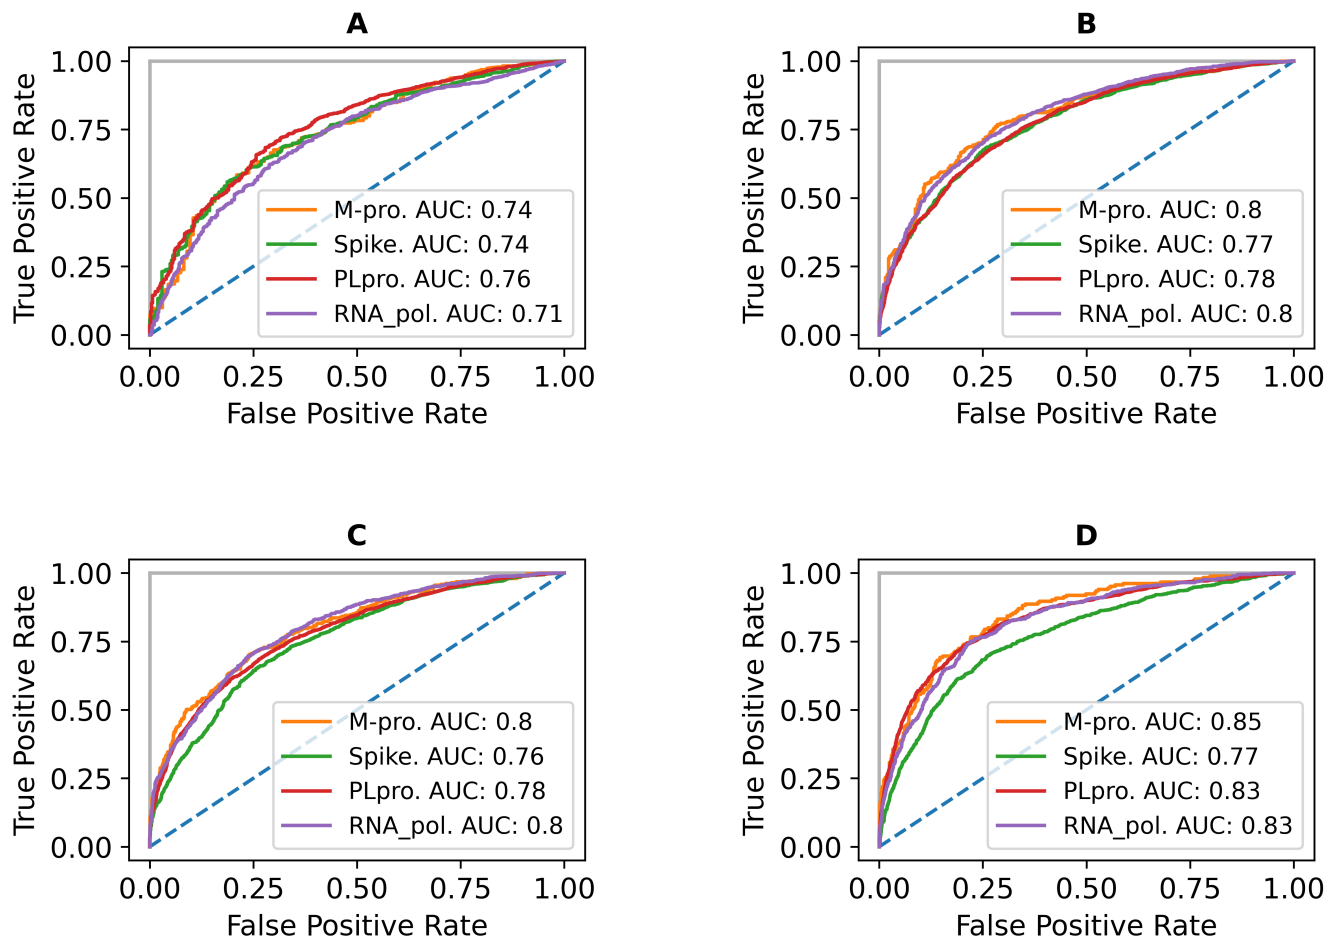

**Figure S5. Top 10 most important variables in predicting the position of the SARS-CoV-2 genome where a RM will take place. Calculated across 4 NDRL thresholds on the test set according to the SHAP values extracted from the model.**

*In this Figure the most important variables appear on the top, a priority of 1 means more important and 10 less important. On the horizontal axis, from left to right the degree (threshold) of the recurrent mutation increases. A dark blue color means more important and a lighter blue less important. Each column was normalized among all the variables before cutting the top 10. The procedure to calculate this values is present in the section **Materials and methods**.*

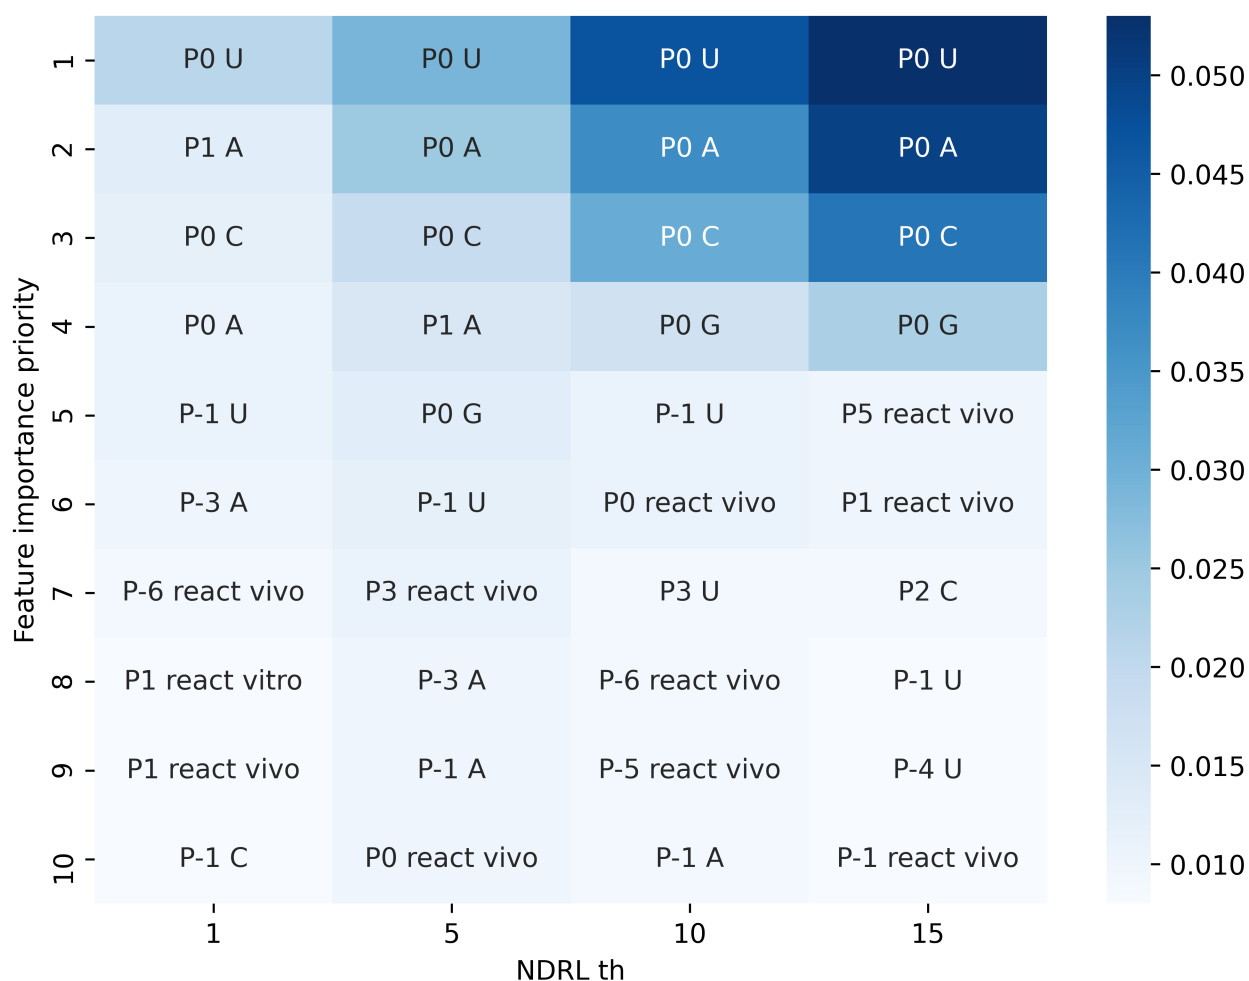

**Figure S6. Mutation promoters or inhibitors' nucleotides, by position and NDRL thresholds on the test set according to the model SHAP values.**

The subplots A, B, C and D correspond to the feature importance across the thresholds 1, 5, 10 and 15 of the NDRL respectively. The values are normalized over the maximum absolute value across all the variables' SHAP values. Each box takes a positive value if that variable promotes mutations or otherwise takes a negative value.

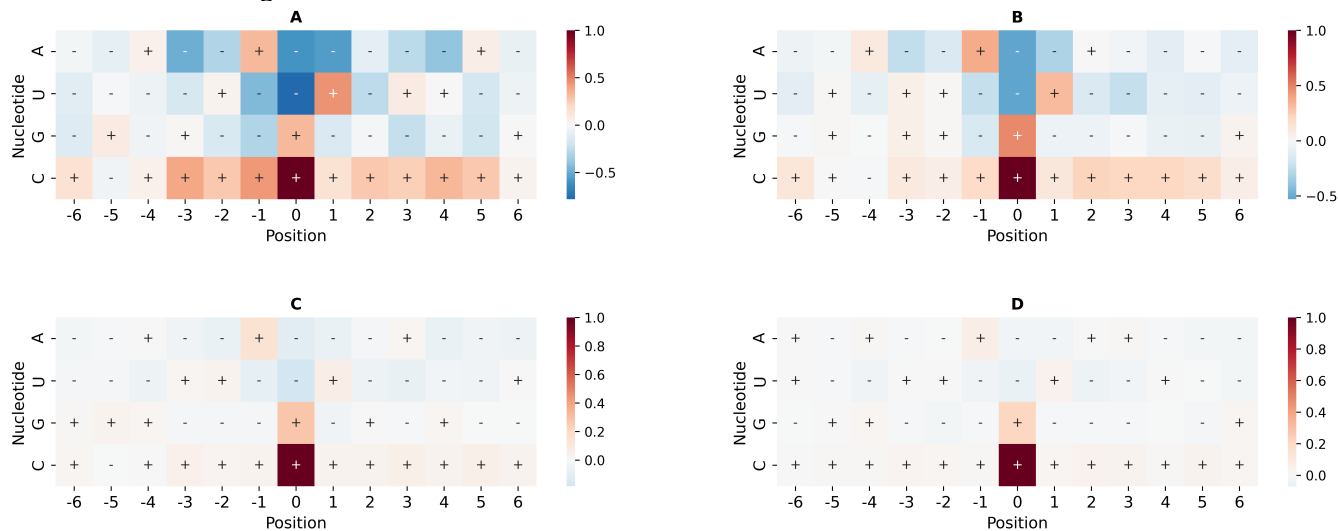

**Figure S7. Mutation promoters or inhibitors' RNA normalized in vivo reactivity intervals, by position and NDRL thresholds on the test set according to the model SHAP values.**

The subplots A, B, C and D correspond to the feature importance across the thresholds 1, 5, 10 and 15 of the NDRL respectively. The values are normalized over the maximum absolute value across all the variables' SHAP values. Each box takes a positive value if that variable promotes mutations or otherwise takes a negative value.

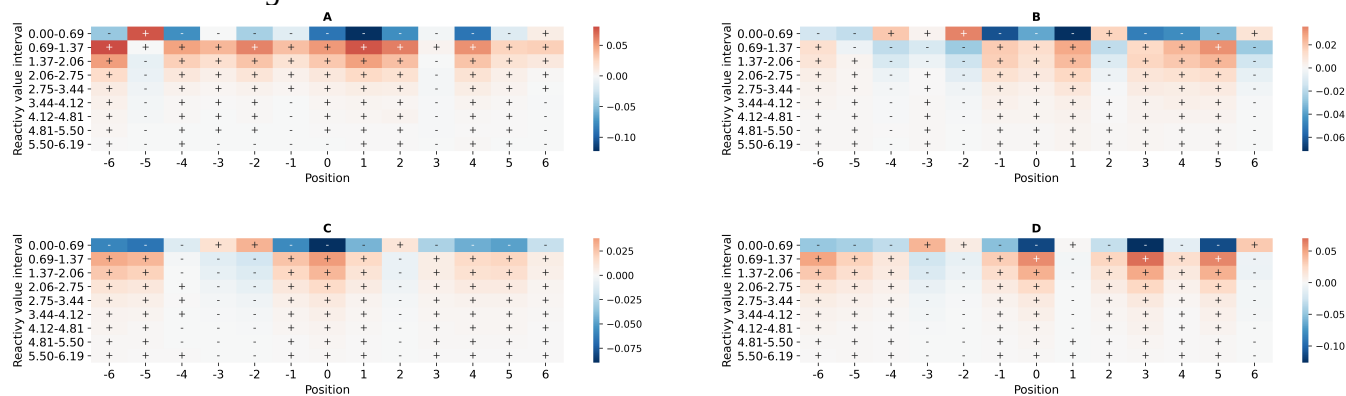



**Figure S8. Receiver Operating Characteristic (ROC) curve for the testing, validation and training set using 5, 10 and 15 as thresholds for the Mutations NDRL.**

The orange, green and red lines correspond to the NDRL 5, 10 and 15 thresholds. The blue dashed line in the diagonal represents a random prediction score.

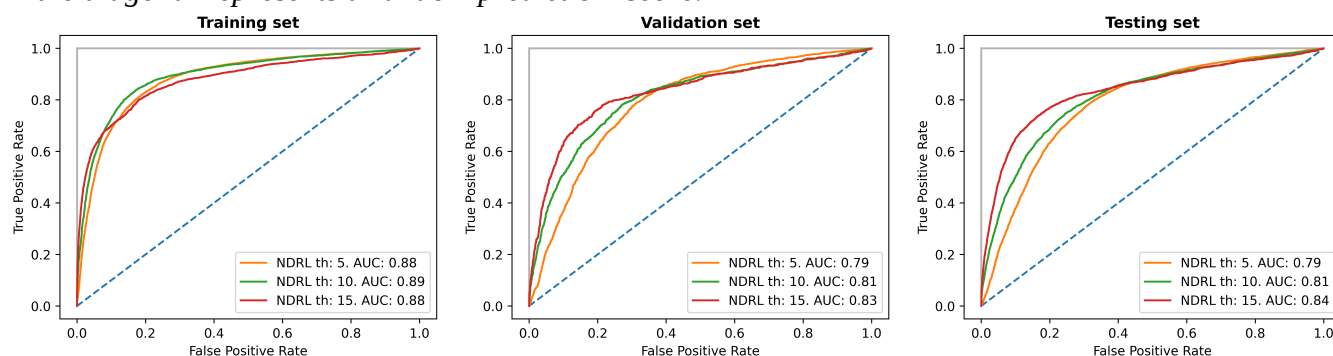

**Figure S9. Receiver Operating Characteristic (ROC) curve of the testing set genes using 5, 10 and 15 as thresholds for the Mutations NDRL.** Subplots A, B and C correspond to the NDRL 5, 10 and 15 thresholds. The orange, green, red and purple lines correspond to the genes M-pro, Spike (S), PLpro and RNA\_pol. The blue dashed line in the diagonal represents a random prediction score.

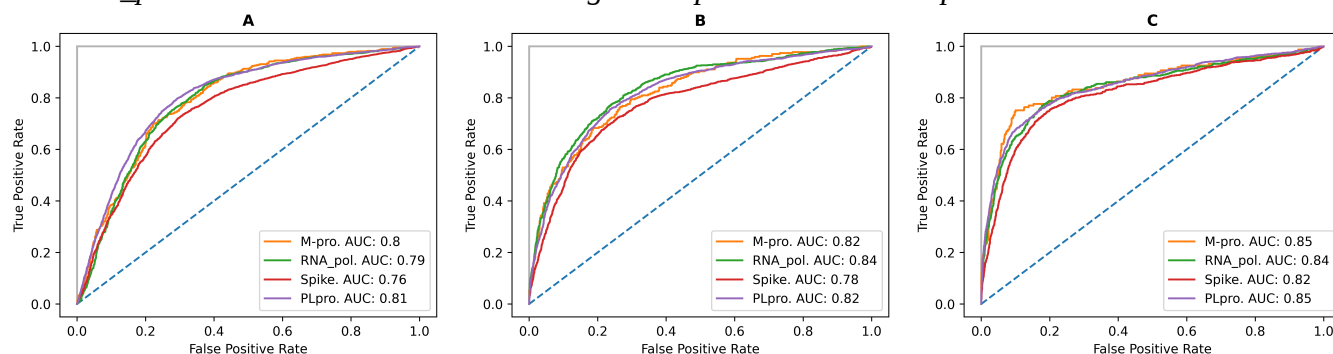

**Figure S10. Top 10 most important variables in predicting the NDRL of a mutation of the SARS-CoV-2. Calculated across 3 NDRL thresholds on the test set according to the SHAP values extracted from the model.**

*In this Figure the most important variables appear on the top, a priority of 1 means more important and 10 less important. On the horizontal axis, from left to right the degree (threshold) of the recurrent mutation increases. A dark blue color means more important and a lighter blue less important. Each column was normalized among all the variables before cutting the top 10. The procedure to calculate this values is present in the section **Materials and methods**.*

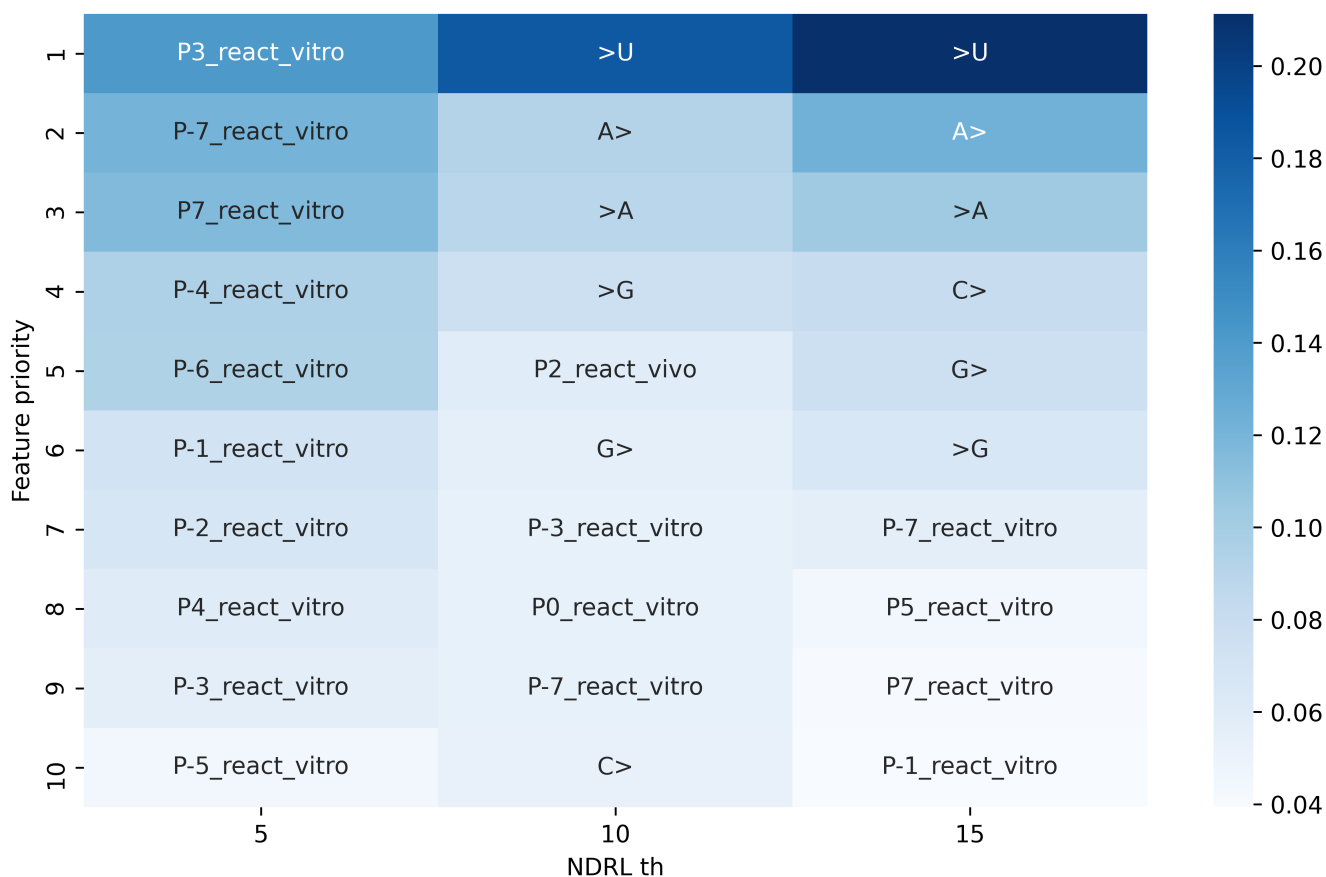

**Figure S11. Spike Predicted amino acid changes, ground truth from 2022, NDRL 15.**

*This Figure shows the reference Spike protein amino acid sequence in black, in the first line of each subplot. Each subplot contains the sequence split into a maximum number of 100 residues. The possible amino acids (AA) produced by the predicted mutations, of  $NDRL \geq 15$ , are stacked over the reference sequence. True positives, false positives and false negatives are shown in green, red and dark yellow/gold, respectively. A start \* represents a stop codon and a same AA represents a synonym mutation.*

I T T R V R S N G Y H CIGT M N  
 G L L S L S R F T S R T K N I S S L T Y T I S V F S D L C F A Y I L V F Y F C W R V T Y G A T D K T S D S I S T D G I Y C I G T M N  
 F L L F L L P F F R H F T I S R T K N I S S L T Y T I S V F S D L C F A Y I L V F Y F C W R V T Y G A T D K T S D S I S T D G I Y C I G T M N  
 M L A F L A F F S L V S C L C F N F S I S R F L S S F S F S C C F S Y P V N A F R S L A F H S H D L F P F F S N I S L F H S I H V S E I N C S T K F A N P V L S F N A C F S F S F V K S I I  
 M F V F L V L L P L V S S Q C V N L T N T Q L P P A Y T N S F T R G V Y Y P K V F R S S V L H S T Q D L F L P F F S N V T V F H A I H V S G T N G T K A F D N P V L P F N D G V Y F A S T E K S N I  
 1 10 20 30 40 50 60 70 80 90 100  
 G S V Y G N \* K N Y T H D G N O Y T S L G S V N R E R V S W T M S V M Y Y  
 R S L S T L D S T I F N I T F N I S S F S A P S K Y S L C S S C S S V C Y L H S W S L L I C N O W I S A A V V \* A L D P L S I M  
 I C L V C C T S F A L M T L S L F I D T N S S N V V K V C O F C N D L F A F Y L E I I C L I E C V F \* S S C V N C S F D V S H S F F I D L D V N H C T F \* D F K F L S \* I D C C  
 I R G W I F G T T L D S K T Q S L L V N N A T N V V I K V C E F Q C N D P L G V Y Y H K N K S W M E S E F R V Y S S A N N C T F E Y V S Q P F L M D L E G K Q G N F K N L R E F V F K N I D G Y  
 101 110 120 130 140 150 160 170 180 190 200  
 K S L Y Q T L S V L Y L W T T I S V F I H G G C V R S I P S I Y T T T I E V L Y V Y V  
 N R A L H H A E S V L F O S L L D \* L V N L M S F A L Y \* R S S P C D F F A D R T A G A S A Y A H O L T T N S S K R S T D S I D C S P G S  
 Y S E H M L T T F V C D L P H N I F N I T F N I S S F S A P S K Y S L C S S C S S V C Y L H S W S L L I C N O W I S A A V V \* A L D P L S I M  
 F K I Y S K H T P I N L V R D L P O G F S A L E P L V D L P I G I N I T R F O T L L A L H R S Y T P G S S S G W T A G A A Y Y G Y L O P R T F L L Y K N E N G T I T D A V D C A L D P L S E T K  
 201 210 220 230 240 250 260 270 280 290 300  
 S K I L N V Y S F O I R I L S F W S S G F A T K V W K M R S S F T Y F L I V P S I T T S G L A I N A \* S T S S S  
 M F N F T I I R S N R L S I \* V H S S D S I \* F S N S N L C A F A D A L N S I \* F S S Y S L I R K \* I C I C A A Y Y S V L S N S A L S F S M C Y \* V S S S I K D L C T N V Y A A L F  
 C T L I S F S V O K \* I Y K S S I \* V H S S D S I \* F S N S N L C A F A D A L N S I \* F S S Y S L I R K \* I C I C A A Y Y S V L S N S A L S F S M C Y \* V S S S I K D L C T N V Y A A L F  
 C T L K S F T Y E K G I Y O T S N F R Y O P T E S I V R F P N I T L C P F G E V F N A T R F A S Y A W N R K R I S N C A D Y S V L Y N S A S F S T F K C Y G V S P T K L N D L C F T N V Y A D S G  
 301 310 320 330 340 350 360 370 380 390 400  
 S R Y S S S W N T T A S Y P D S A V F V I S R K Y S K T M S V F C R \* O I F R M T N P Y I S S L C L V S C I L T R F G F F F C S S L Y D C S  
 L R G A O R N S L A R T T A S Y P D S A V F V I S R K Y S K T M S V F C R \* O I F R M T N P Y I S S L C L V S C I L T R F G F F F C S S L Y D C S  
 V \* C D D V I A P G K S W S Y S I F L A D F I C C A I A L S W N L D S K D C C S M Y S \* L K W S M L K S F V \* D A A Q I V H A C I S S K C V D C T C Y L P F L S S C F H L S  
 V I R G D E V R Q I A P G O T G K I A D N Y K P D D F T G C V I A W N S N L D S K V G G N Y N Y L F R K S N L K P F E R D I S T E I Y Q A G S T P C N G V E G F N C Y F P L O S Y G G O P T  
 401 410 420 430 440 450 460 470 480 490 500  
 Y S K R I S Y S F E F V V Y R M Y S L S T S L K T I V S I O N N S S S V D I I Y S P A S L T V L F D T T S F S S S T A  
 T G F R F L H R Y D F P A P P T S G S E S A F \* N K C V N F N F N C S C A C V F S Y S I K F L P F H L C \* V I S D T S D A V R O P H S L A I L V L S L S F C C V C I S P  
 N G V G Y Q P Y R V V L S F E L L H A P A T Y G P K K S T N L V K N C V N F N F N C S C A C V F S Y S I K F L P F H L C \* V I S D T S D A V R O P H S L A I L V L S L S F C C V C I S P  
 501 510 520 530 540 550 560 570 580 590 600  
 T S Q Q V I Y A W R S T T S F G T C A V L E D K P N S L S D D P N S V S R V L I R N S W R T V T C A S Y L S G  
 S T I L S S L F I F T P A S N O V A T S S C C D S I C S N F F S H S C C I G A D H V I I S Y V C V I L I C A C V C A C Y O T L S T S H R L S C C V C S F I I V F S M \* L C  
 \* I N S S N H V A V Y H D A N C I D V S V A I H S D H S P S C C D S I C S N F F S H S C C I G A D H V I I S Y V C V I L I C A C V C A C Y O T L S T S H R L S C C V C S F I I V F S M \* L C  
 I S S K I N A I G S L K A L Y V N L I A N T C G I V I H V L F S F S S C A H V E L H D V V N K A H A N M L N H S S N F C S S C A N D I A C L D N A A A D V I A M F I S C \*  
 601 610 620 630 640 650 660 670 680 690 700  
 V G A L F Y Y F N N A P S I T S T S P I A T T T T F S S I O F I K L F Y V R S S L I R S T A L A V L D N T K V G F A K Y T S S L N H C R  
 S O N S V S F T S I S I L S S I C V I S I L A V S M I K I S L Y I N Y L C D S S D C C N F L S C C I H L N C A C I S A D H V I I H D A C H S V N I K Y T S S L N H C R  
 A E N S Y A S N S I A I T N F I Y T T E L L P V S N K T S Y D C T N Y C G D S T E S C N L L O Y G S C T Q L N R A L T G I A V E Q D K N T Q E V F A Q V K I Y K T P I K P G G F  
 701 710 720 730 740 750 760 770 780 790 800  
 T S T W G S L T V Y V D V H R Y S G V V V T A K F S V N S S T E V S V V T S S V V  
 L P N L L S C M N L V E A F I A S S D S C T L S G A F C G L A T R V F V M Y I C L T L P S L T D V A C Y S L V I F W S G S G A V T S T  
 T S S I F D S S K L I K K S F I D L L P F N V I L A A A G F I N H Y C D C L D I S S \* D L L C S N L N G F S A F L A F L S E M I S Y S S A L F A C S I S S C L I F C A C S S F I S F A M  
 N F S O I L P D P S K P S K R S F I D L L F N K V T L A D A G F I K O Y G C D L G D I A A R D L I C A Q F N G L T V L P L L T D E N I A Q Y T S A L L A G T I T S G W T F G A G A A L O I P F A M  
 801 810 820 830 840 850 860 870 880 890 900  
 W T R S G V R H T S S T V S T I S A D G Y H N I T S S L \* N P L H I N S S T V Y S S R I F T R S Y S R V V S D W V G  
 M Y M L T C T \* T P N V D I F T S I R S C T D S F S T S S L \* N P L H I N S S T V Y S S R I F T R S Y S R V V S D W V G  
 Q M A Y R F N G I G Y T O N Y L Y E N Q K L I A N Q F N S A I G K I Q D S L S S T A S A L G K I Q D V V N Q A Q A L N T L Y K O L S S N F G A I S S V L N D I L S R L D K V E A E V O I D R L I T G R  
 901 910 920 930 940 950 960 970 980 990 1000  
 T O P I S S S V R Y Y A T S I K L V S R N S D R R M R S I F L S L S S Y G L L E T S F S A K Y I T S P D P A N A L S P O G L T V T  
 L C L L S V V T H H \* A A V I \* S S N L A S I \* A C V L \* S I \* V A F C \* K Y H P S F P L A P H C V V F F H V S Y V P S H M I F S S A S A T C H D \* K S H F C \* A V F A S N C S  
 L Q S L O T Y V T Q Q L I R A A E I R A S A N L A A T K M S E C V L G Q S K R Y D F C G K G Y H L M S F P Q S A P H G V V F L H V T Y Y P A Q E K N F T T A P A I C H D G K A H F P R E G V F V N G T  
 1001 1010 1020 1030 1040 1050 1060 1070 1080 1090 1100  
 Y S W V Y G M V I S H P L O R Y Y T E Y S Y V D R V G S T N T Y R L Y A T K Y N H  
 Q W L S R \* S P V V T H L A N C D L L T F N N T S H P L O R Y Y T E Y S Y V D R V G S T N T Y R L Y A T K Y N H  
 L L F I I M T Y D L I L S I V I S F V S C I \* A V I \* I V I I S Y D F H A F D L F K D V F A \* N P S S L A A G F C D I S V L N S S V L N I I O I D C L N D V S N T F N O S L I D L  
 H W F V T Q R N F Y E P Q I I T T D N T F V S G N C D V V I G I V N N T Y Y D L P O P E L D S F K E E L D K Y F K N H T S P O V D L G D I S G I N A S V V N I O K E I D R L N E V A K N L N E S I D L  
 1101 1110 1120 1130 1140 1150 1160 1170 1180 1190 1200  
 K O F M Y A H C S W C T L R R V S C F A V A K A A M F F I N F S R S H M V F S R S F F S G E Y F A R V P A R V F  
 H D L \* N S D L M \* L L V L C L C I A G L I S I L I V S I C M I C C C C L N C C S C G G C F O D D V S D L V L E \* V F H Y S  
 Q E L G K Y E Q Y I K \* P W Y I \* W L G F I A G L I A I V M Y T I M L C C M T S C C S C L K G C C S C G S C C K F D E D D S E P V L K G V K L H Y T \*  
 1201 1210 1220 1230 1240 1250 1260 1270 1274

**Table S1. VoC mutations of the testing set.**

| Position | VOC                               | Gene    | Mutation | AA     | N <sup>i</sup> | Countries <sup>i</sup> | NL <sup>i†</sup> | NDRL <sup>i†</sup> |          | Prediction position <sup>‡</sup> |      |       |       | Prediction mutation <sup>‡</sup> |       |       |
|----------|-----------------------------------|---------|----------|--------|----------------|------------------------|------------------|--------------------|----------|----------------------------------|------|-------|-------|----------------------------------|-------|-------|
|          |                                   |         |          |        |                |                        |                  | position           | mutation | 1/3                              | 5/15 | 10/30 | 15/45 | 5/15                             | 10/30 | 15/45 |
| 2832     | omicron                           | nsp3    | A2832G   | K38R   | 1331           | 39                     | 47               | 48                 | 46       | tp                               | tp   | fn    | fn    | tp                               | tp    | fn    |
| 3267     | alpha                             | nsp3    | C3267U   | T183I  | 903,866        | 164                    | 246              | 241                | 238      | tp                               | tp   | tp    | tp    | tp                               | tp    | tp    |
| 3828     | gamma                             | nsp3    | C3828U   | S370L  | 90,140         | 100                    | 219              | 198                | 197      | tp                               | tp   | tp    | tp    | tp                               | tp    | tp    |
| 5230     | beta                              | nsp3    | G5230U   | K837N  | 30,479         | 120                    | 237              | 240                | 233      | tp                               | tp   | tp    | tp    | tp                               | tp    | tp    |
| 5388     | alpha                             | nsp3    | C5388A   | A890D  | 899,293        | 163                    | 116              | 149                | 108      | tp                               | tp   | tp    | tp    | tp                               | fn    | fn    |
| 5648     | gamma                             | nsp3    | A5648C   | K977Q  | 84,776         | 80                     | 60               | 43                 | 39       | fn                               | fn   | fn    | tn    | fn                               | fn    | tn    |
| 6515     | omicron                           | nsp3    | U6515A   | L1266I | 61             | 4                      | 3                | 15                 | 3        | tp                               | fn   | tn    | tn    | tn                               | tn    | tn    |
| 6954     | alpha                             | nsp3    | U6954C   | I1412T | 896,419        | 163                    | 159              | 152                | 151      | tp                               | tp   | tp    | fn    | fn                               | fn    | fn    |
| 8393     | omicron                           | nsp3    | G8393A   | A1892T | 722            | 30                     | 33               | 43                 | 32       | tp                               | tp   | fn    | tn    | tp                               | tp    | tn    |
| 10323    | beta                              | M-pro   | A10323G  | K90R   | 96,647         | 157                    | 519              | 514                | 514      | tp                               | tp   | fn    | tp    | tp                               | tp    | fn    |
| 10449    | omicron                           | M-pro   | C10449A  | P132H  | 1064           | 32                     | 33               | 173                | 31       | tp                               | tp   | tp    | tp    | fn                               | fn    | tn    |
| 14408    | omicron gamma<br>delta beta alpha | RNA_pol | C14408U  | P323L  | 4,577,014      | 193                    | 1450             | 1                  | 1        | fp                               | fp   | fp    | fp    | fp                               | fp    | fp    |
| 15451    | delta                             | RNA_pol | G15451A  | G671S  | 2,769,305      | 167                    | 302              | 130                | 124      | tp                               | tp   | tp    | tp    | tp                               | tp    | tp    |
| 21614    | gamma                             | S       | C21614U  | L18F   | 167,687        | 145                    | 428              | 399                | 397      | tp                               | tp   | tp    | tp    | tp                               | tp    | tp    |
| 21618    | delta                             | S       | C21618G  | T19R   | 2,779,017      | 167                    | 237              | 128                | 58       | tp                               | tp   | tp    | tp    | fn                               | fn    | fn    |
| 21621    | gamma                             | S       | C21621A  | T20N   | 83,978         | 84                     | 74               | 223                | 52       | tp                               | tp   | tp    | tp    | fn                               | fn    | fn    |
| 21638    | gamma                             | S       | C21638U  | P26S   | 94,133         | 109                    | 238              | 222                | 216      | tp                               | tp   | tp    | tp    | tp                               | tp    | tp    |
| 21762    | omicron                           | S       | C21762U  | A67V   | 13,723         | 103                    | 244              | 248                | 244      | tp                               | tp   | tp    | tp    | tp                               | tp    | tp    |
| 21801    | beta                              | S       | A21801C  | D80A   | 25,012         | 108                    | 88               | 133                | 84       | tp                               | tp   | fn    | fn    | fn                               | fn    | fn    |
| 21846    | omicron                           | S       | C21846U  | T95I   | 1,253,114      | 160                    | 452              | 427                | 420      | tp                               | tp   | tp    | tp    | tp                               | tp    | tp    |
| 21974    | gamma                             | S       | G21974U  | D138Y  | 90,868         | 112                    | 261              | 290                | 239      | tp                               | fn   | tp    | tp    | tp                               | tp    | tp    |
| 21995    | omicron                           | S       | U21995G  | Y145D  | 90             | 8                      | 18               | 110                | 18       | tp                               | fn   | fn    | fn    | fn                               | tn    | tn    |
| 22034    | delta                             | S       | A22034G  | R158G  | 4072           | 40                     | 124              | 127                | 124      | tp                               | fn   | tp    | tp    | fn                               | tp    | fn    |
| 22132    | gamma                             | S       | G22132U  | R190S  | 83,999         | 91                     | 80               | 110                | 59       | tp                               | tp   | tp    | tp    | tp                               | tp    | tp    |
| 22206    | beta                              | S       | A22206G  | D215G  | 25,381         | 115                    | 138              | 142                | 134      | tp                               | tp   | tp    | tp    | tp                               | tp    | fn    |
| 22578    | omicron                           | S       | G22578A  | G339D  | 1130           | 44                     | 64               | 69                 | 62       | tp                               | fn   | tp    | tp    | tp                               | tp    | fn    |
| 22679    | omicron                           | S       | U22679C  | S373P  | 1003           | 38                     | 58               | 59                 | 56       | tp                               | fn   | fn    | fn    | tp                               | fn    | fn    |
| 22686    | omicron                           | S       | C22686U  | S375F  | 888            | 32                     | 47               | 46                 | 45       | tp                               | tp   | tp    | tp    | tp                               | tp    | tp    |
| 22812    | gamma                             | S       | A22812C  | K417T  | 81,007         | 80                     | 36               | 32                 | 15       | tp                               | tp   | fn    | tn    | fn                               | tn    | tn    |
| 22813    | omicron beta                      | S       | G22813U  | K417N  | 29,436         | 116                    | 131              | 144                | 125      | tp                               | tp   | tp    | tp    | tp                               | tp    | tp    |
| 22882    | omicron                           | S       | U22882G  | N440K  | 4754           | 60                     | 57               | 91                 | 54       | tp                               | tp   | tp    | tp    | fn                               | fn    | fn    |
| 22898    | omicron                           | S       | G22898A  | G446S  | 1194           | 53                     | 88               | 92                 | 88       | tp                               | fn   | tp    | tp    | tp                               | fn    | tp    |

|       |                                |   |         |        |           |     |      |     |     |    |    |    |    |    |    |    |
|-------|--------------------------------|---|---------|--------|-----------|-----|------|-----|-----|----|----|----|----|----|----|----|
| 22917 | delta                          | S | U22917G | L452R  | 2,844,958 | 171 | 321  | 154 | 137 | fn |
| 22992 | omicron                        | S | G22992A | S477N  | 49,484    | 109 | 235  | 276 | 205 | tp | tp | tp | tp | tp | fn | fn |
| 22995 | omicron delta                  | S | C22995A | T478K  | 2,802,366 | 168 | 270  | 123 | 91  | tp | tp | tp | tp | fn | fn | fn |
| 23012 | gamma beta                     | S | G23012A | E484K  | 160,657   | 152 | 306  | 344 | 269 | fn | fn | fn | fn | tp | tp | fn |
| 23013 | omicron                        | S | A23013C | E484A  | 2057      | 58  | 87   | 118 | 85  | tp | tp | fn | fn | fn | fn | fn |
| 23040 | omicron                        | S | A23040G | Q493R  | 899       | 33  | 37   | 70  | 35  | tp | fn | fn | fn | tp | fn | tn |
| 23048 | omicron                        | S | G23048A | G496S  | 894       | 37  | 27   | 31  | 27  | tp | tp | tp | fp | tp | tn | tn |
| 23055 | omicron                        | S | A23055G | Q498R  | 793       | 29  | 38   | 37  | 36  | fn | tp | tp | tn | tp | fn | tn |
| 23063 | omicron gamma beta alpha       | S | A23063U | N501Y  | 1,020,863 | 175 | 280  | 243 | 242 | tp | fn | fn | fn | fn | fn | fn |
| 23075 | omicron                        | S | U23075C | Y505H  | 770       | 33  | 23   | 21  | 21  | tp | fn | tn | tn | tp | fp | tn |
| 23202 | omicron                        | S | C23202A | T547K  | 1082      | 43  | 81   | 251 | 80  | tp | tp | tp | tp | fn | fn | fn |
| 23271 | alpha                          | S | C23271A | A570D  | 898,365   | 163 | 94   | 149 | 86  | tp | tp | tp | tp | fn | fn | fn |
| 23403 | omicron gamma delta beta alpha | S | A23403G | D614G  | 4,589,366 | 193 | 1460 | 1   | 1   | fp | tn | tn | tn | fp | fp | tn |
| 23525 | omicron gamma                  | S | C23525U | H655Y  | 92,088    | 130 | 326  | 299 | 299 | tp |
| 23599 | omicron                        | S | U23599G | N679K  | 2425      | 38  | 36   | 138 | 34  | tp | tp | tp | tp | fn | fn | tn |
| 23604 | omicron delta alpha            | S | C23604A | P681H  | 946,888   | 169 | 309  | 278 | 290 | tp | tp | tp | tp | fn | fn | tp |
| 23664 | beta                           | S | C23664U | A701V  | 53,917    | 128 | 188  | 184 | 184 | tp |
| 23709 | alpha                          | S | C23709U | T716I  | 904,197   | 167 | 247  | 234 | 234 | tp |
| 23854 | omicron                        | S | C23854A | N764K  | 849       | 27  | 26   | 200 | 24  | tp | tp | tp | tp | fn | tn | tn |
| 23948 | omicron                        | S | G23948U | D796Y  | 3967      | 74  | 183  | 216 | 181 | tp |
| 24130 | omicron                        | S | C24130A | N856K  | 658       | 32  | 32   | 314 | 31  | tp | tp | tp | tp | fn | tp | tn |
| 24410 | delta                          | S | G24410A | D950N  | 2,689,287 | 169 | 252  | 107 | 72  | tp | tp | tp | tp | fn | fn | fn |
| 24424 | omicron                        | S | A24424C | Q954H  | 5         | 4   | 4    | 30  | 4   | tp | fn | fn | tn | tn | tn | tn |
| 24469 | omicron                        | S | U24469G | N969K  | 8         | 4   | 8    | 73  | 8   | tp | tp | tp | fn | tn | tn | fp |
| 24503 | omicron                        | S | C24503U | L981F  | 626       | 28  | 23   | 31  | 22  | tp | tp | tp | fp | tp | fp | fp |
| 24506 | alpha                          | S | U24506G | S982A  | 898,085   | 163 | 48   | 40  | 40  | tp | fn | tp | fp | fn | fn | tn |
| 24642 | gamma                          | S | C24642U | T1027I | 91,978    | 106 | 210  | 193 | 187 | tp |
| 24914 | alpha                          | S | G24914C | D1118H | 896,647   | 163 | 124  | 194 | 116 | tp | tp | tp | tp | fn | tp | tp |
| 25088 | gamma                          | S | G25088U | V1176F | 98,400    | 111 | 193  | 169 | 166 | tp |

<sup>i</sup> On January 6, 2022

<sup>†</sup> Number of Pango lineages

<sup>#</sup> 15/45 means that the NDRL threshold of 15 was used for the prediction, but it was evaluated with the ground truth from January 2022, using a NDRL threshold of 45. tp, fp, tn and fn mean true positive, false positive, true negative and false negative, respectively.

**Table S2. Number of neurons per layer for each model (Position prediction)**

| Threshold | L1   | L2   | L3   | L4   | L5   | L6   | L7   | L8   |
|-----------|------|------|------|------|------|------|------|------|
| 1         | 1272 | 1963 | 866  | 451  | 1263 | 427  | 1764 | 1136 |
| 5         | 1927 | 1962 | 1236 | 2043 | 451  | 292  | 2048 | 882  |
| 10        | 530  | 2048 | 454  | 839  | 1508 | 1427 | 2048 | 219  |
| 15        | 1493 | 1676 | 588  | 413  | 1226 | 451  | 63   | 887  |

**Table S3. Model's performance metrics - Position prediction**

| Our selected model                           |       |      |      |      |      |        |      |      |      |             |                 |          |             |
|----------------------------------------------|-------|------|------|------|------|--------|------|------|------|-------------|-----------------|----------|-------------|
| th                                           | set   | sens | spec | auc  | acc  | tp     | tn   | fp   | fn   | Static sens | Raw static sens | Log loss | brier score |
| 1                                            | train | 0.84 | 0.62 | 0.73 | 0.82 | 8929   | 510  | 309  | 1763 | 0.79        | 1.42            | 6.22     | 0.18        |
| 1                                            | val   | 0.84 | 0.46 | 0.65 | 0.80 | 3260   | 223  | 260  | 637  | 0.70        | 1.26            | 7.07     | 0.20        |
| 1                                            | test  | 0.84 | 0.46 | 0.65 | 0.80 | 10,052 | 629  | 727  | 1963 | 0.70        | 1.26            | 6.95     | 0.20        |
| 5                                            | train | 0.82 | 0.64 | 0.73 | 0.77 | 6786   | 2071 | 1186 | 1468 | 0.80        | 1.44            | 7.96     | 0.23        |
| 5                                            | val   | 0.81 | 0.58 | 0.70 | 0.72 | 2188   | 982  | 697  | 513  | 0.77        | 1.38            | 9.54     | 0.28        |
| 5                                            | test  | 0.80 | 0.60 | 0.70 | 0.73 | 6801   | 2893 | 1950 | 1727 | 0.44        | 0.80            | 9.50     | 0.27        |
| 10                                           | train | 0.80 | 0.69 | 0.74 | 0.74 | 4365   | 4138 | 1902 | 1106 | 0.44        | 0.80            | 9.03     | 0.26        |
| 10                                           | val   | 0.79 | 0.63 | 0.71 | 0.69 | 1277   | 1752 | 1019 | 332  | 0.44        | 0.79            | 10.65    | 0.31        |
| 10                                           | test  | 0.75 | 0.66 | 0.70 | 0.70 | 3889   | 5408 | 2743 | 1331 | 0.41        | 0.75            | 10.52    | 0.30        |
| 15                                           | train | 0.83 | 0.73 | 0.78 | 0.76 | 3013   | 5787 | 2105 | 606  | 0.85        | 1.53            | 8.13     | 0.24        |
| 15                                           | val   | 0.82 | 0.68 | 0.75 | 0.71 | 829    | 2299 | 1068 | 184  | 0.82        | 1.48            | 9.87     | 0.29        |
| 15                                           | test  | 0.79 | 0.69 | 0.74 | 0.71 | 2524   | 7030 | 3147 | 670  | 0.44        | 0.79            | 9.86     | 0.29        |
| Baseline with mljar-supervised, compete mode |       |      |      |      |      |        |      |      |      |             |                 |          |             |
| th                                           | set   | sens | spec | auc  | acc  | tp     | tn   | fp   | fn   | Static sens | Raw static sens | Log loss | brier score |
| 1                                            | train | 1.00 | 0.01 | 0.51 | 0.93 | 10,692 | 11   | 808  | 0    | 0.45        | 0.81            | 2.42     | 0.07        |
| 1                                            | val   | 1.00 | 0.00 | 0.50 | 0.89 | 3897   | 0    | 483  | 0    | 0.44        | 0.80            | 3.81     | 0.11        |
| 1                                            | test  | 1.00 | 0.00 | 0.50 | 0.90 | 12,015 | 2    | 1354 | 0    | 0.45        | 0.80            | 3.50     | 0.10        |
| 5                                            | train | 0.83 | 0.53 | 0.68 | 0.74 | 6833   | 1733 | 1524 | 1421 | 0.74        | 1.33            | 8.84     | 0.26        |
| 5                                            | val   | 0.85 | 0.52 | 0.69 | 0.73 | 7291   | 2507 | 2336 | 1237 | 0.73        | 1.32            | 9.23     | 0.27        |
| 5                                            | test  | 0.85 | 0.52 | 0.69 | 0.73 | 7291   | 2507 | 2336 | 1237 | 0.73        | 1.32            | 9.23     | 0.27        |
| 10                                           | train | 0.62 | 0.80 | 0.71 | 0.71 | 3377   | 4851 | 1189 | 2094 | 0.34        | 0.62            | 9.85     | 0.29        |
| 10                                           | val   | 0.66 | 0.78 | 0.72 | 0.74 | 1057   | 2175 | 596  | 552  | 0.36        | 0.66            | 9.05     | 0.26        |
| 10                                           | test  | 0.65 | 0.79 | 0.72 | 0.73 | 3367   | 6444 | 1707 | 1853 | 0.36        | 0.65            | 9.20     | 0.27        |



|    |       |      |      |      |      |      |      |     |      |      |      |      |      |
|----|-------|------|------|------|------|------|------|-----|------|------|------|------|------|
| 15 | train | 0.43 | 0.95 | 0.69 | 0.79 | 1574 | 7504 | 388 | 2045 | 0.24 | 0.43 | 7.30 | 0.21 |
| 15 | val   | 0.43 | 0.95 | 0.69 | 0.79 | 1574 | 7504 | 388 | 2045 | 0.24 | 0.43 | 7.30 | 0.21 |
| 15 | test  | 0.45 | 0.94 | 0.69 | 0.82 | 1425 | 9567 | 610 | 1769 | 0.25 | 0.45 | 6.15 | 0.18 |

**Th:** recurrent mutation threshold. **Sens:** sensitivity. **Spec:** specificity. **Auc:** area under the curve, **Acc:** accuracy. **Tp:** true positives. **Tn:** true negatives. **Fp:** false positives. **Fn:** false negatives. **Static sens:** Model selection metric, does not count spec while sens is lower than 0.8. Afterwards, spec is added to the maximum allowed sens 0.8. Value between 0 and 1, 1 better. **raw static sens:** Same as static sens, but no normalization. If lower than 0.8 only sens was considered. Maximum value is 1.8. **log loss:** logistic loss sum. **brier score:** uncertainty quality measurement.

**Table S4. Model's performance metrics - Mutation prediction**

| Our selected model                           |       |      |      |      |      |      |        |      |      |             |                 |          |             |
|----------------------------------------------|-------|------|------|------|------|------|--------|------|------|-------------|-----------------|----------|-------------|
| th                                           | set   | sens | spec | auc  | acc  | tp   | tn     | fp   | fn   | static sens | Raw static sens | Log loss | brier score |
| 5                                            | train | 0.81 | 0.80 | 0.81 | 0.80 | 8135 | 9343   | 2397 | 1852 | 0.89        | 1.60            | 6.75     | 0.20        |
| 5                                            | val   | 0.80 | 0.63 | 0.72 | 0.71 | 2450 | 2623   | 1518 | 594  | 0.80        | 1.43            | 10.15    | 0.29        |
| 5                                            | test  | 0.78 | 0.66 | 0.72 | 0.71 | 7582 | 8750   | 4563 | 2116 | 0.43        | 0.78            | 10.03    | 0.29        |
| 10                                           | train | 0.87 | 0.77 | 0.82 | 0.79 | 4471 | 12,713 | 3852 | 691  | 0.87        | 1.57            | 7.22     | 0.21        |
| 10                                           | val   | 0.80 | 0.66 | 0.73 | 0.69 | 1172 | 3778   | 1950 | 285  | 0.81        | 1.46            | 10.74    | 0.31        |
| 10                                           | test  | 0.79 | 0.67 | 0.73 | 0.70 | 3670 | 12,366 | 5993 | 982  | 0.44        | 0.79            | 10.47    | 0.30        |
| 15                                           | train | 0.83 | 0.76 | 0.79 | 0.77 | 2609 | 14,183 | 4384 | 551  | 0.87        | 1.56            | 7.85     | 0.23        |
| 15                                           | val   | 0.80 | 0.70 | 0.75 | 0.71 | 712  | 4419   | 1881 | 173  | 0.83        | 1.50            | 9.87     | 0.29        |
| 15                                           | test  | 0.80 | 0.72 | 0.76 | 0.73 | 2186 | 14,571 | 5720 | 534  | 0.84        | 1.52            | 9.39     | 0.27        |
| Baseline with mljar-supervised, compete mode |       |      |      |      |      |      |        |      |      |             |                 |          |             |
| th                                           | set   | sens | spec | auc  | acc  | tp   | tn     | fp   | fn   | Static sens | Raw static sens | Log loss | brier score |
| 5                                            | train | 0.76 | 0.83 | 0.79 | 0.80 | 7582 | 9732   | 2008 | 2405 | 0.42        | 0.76            | 7.02     | 0.20        |
| 5                                            | val   | 0.80 | 0.76 | 0.78 | 0.78 | 2431 | 3154   | 987  | 613  | 0.44        | 0.80            | 7.69     | 0.22        |
| 5                                            | test  | 0.77 | 0.78 | 0.77 | 0.77 | 7453 | 10,361 | 2952 | 2245 | 0.43        | 0.77            | 7.80     | 0.23        |
| 10                                           | train | 0.48 | 0.96 | 0.72 | 0.85 | 2497 | 15890  | 675  | 2665 | 0.27        | 0.48            | 5.31     | 0.15        |
| 10                                           | val   | 0.49 | 0.94 | 0.72 | 0.85 | 720  | 5374   | 354  | 737  | 0.27        | 0.49            | 5.24     | 0.15        |
| 10                                           | test  | 0.51 | 0.94 | 0.73 | 0.86 | 2371 | 17,348 | 1011 | 2281 | 0.28        | 0.51            | 4.94     | 0.14        |
| 15                                           | train | 0.51 | 0.96 | 0.74 | 0.90 | 1626 | 17,905 | 662  | 1534 | 0.29        | 0.51            | 3.49     | 0.10        |
| 15                                           | val   | 0.55 | 0.91 | 0.73 | 0.87 | 491  | 5739   | 561  | 394  | 0.31        | 0.55            | 4.59     | 0.13        |
| 15                                           | test  | 0.55 | 0.95 | 0.75 | 0.91 | 1491 | 19,357 | 934  | 1229 | 0.30        | 0.55            | 3.25     | 0.09        |

**Th:** recurrent mutation threshold. **Sens:** sensitivity. **Spec:** specificity. **Auc:** area under the curve, **Acc:** accuracy. **Tp:** true positives. **Tn:** true negatives. **Fp:** false positives. **Fn:** false negatives. **Static sens:** Model selection metric, does not count spec while sens is lower than 0.8. Afterwards, spec is added to the maximum allowed sens 0.8. Value between 0 and 1, 1 better. **raw static sens:** Same as static sens, but no normalization. If lower than 0.8 only sens was considered. Maximum value is 1.8. **log loss:** logistic loss sum. **brier score:** uncertainty quality measurement.

**Table S5. McNemar’s test between our models and baseline models with mljar-supervised.**

| Position prediction |       |          |        |               |            |
|---------------------|-------|----------|--------|---------------|------------|
| th                  | set   | chi2     | p<0.05 | p value round | p value    |
| 1                   | train | 705.203  | True   | 0.000000      | 2.209E-155 |
| 1                   | val   | 198.336  | True   | 0.000000      | 4.818E-45  |
| 1                   | test  | 688.118  | True   | 0.000000      | 1.147E-151 |
| 5                   | train | 38.141   | True   | 0.000000      | 6.582E-10  |
| 5                   | val   | 0.059    | False  | 0.807799      | 8.078E-1   |
| 5                   | test  | 4.006    | True   | 0.045327      | 4.534E-2   |
| 10                  | train | 29.710   | True   | 0.000000      | 5.018E-08  |
| 10                  | val   | 44.497   | True   | 0.000000      | 2.547E-11  |
| 10                  | test  | 100.523  | True   | 0.000000      | 1.170E-23  |
| 15                  | train | 23.993   | True   | 0.000001      | 9.669E-07  |
| 15                  | val   | 164.567  | True   | 0.000000      | 1.137E-37  |
| 15                  | test  | 560.524  | True   | 0.000000      | 6.467E-124 |
| Mutation prediction |       |          |        |               |            |
| th                  | set   | chi2     | p<0.05 | p value round | p value    |
| 5                   | train | 6.933    | True   | 0.008460      | 8.4598E-3  |
| 5                   | val   | 188.671  | True   | 0.000000      | 6.199E-43  |
| 5                   | test  | 512.707  | True   | 0.000000      | 1.633E-113 |
| 10                  | train | 263.506  | True   | 0.000000      | 2.953E-59  |
| 10                  | val   | 603.720  | True   | 0.000000      | 2.598E-133 |
| 10                  | test  | 2031.030 | True   | 0.000000      | 0          |
| 15                  | train | 1559.527 | True   | 0.000000      | 0          |
| 15                  | val   | 763.524  | True   | 0.000000      | 4.601E-168 |
| 15                  | test  | 3001.633 | True   | 0.000000      | 0          |

**Table S6. Model's uncertainty quality. Brier score.**

| Position prediction |          |          |          |
|---------------------|----------|----------|----------|
| th                  | train    | val      | test     |
| 1                   | 0.131931 | 0.159333 | 0.155308 |
| 5                   | 0.172322 | 0.207497 | 0.203409 |
| 10                  | 0.204331 | 0.246146 | 0.243646 |
| 15                  | 0.202455 | 0.250927 | 0.249452 |
| Mutation prediction |          |          |          |
| th                  | train    | val      | test     |
| 5                   | 0.248211 | 0.248999 | 0.248900 |
| 10                  | 0.249022 | 0.249823 | 0.249600 |
| 15                  | 0.249590 | 0.250531 | 0.250194 |

*The brier score goes from 0 to 1. The lower the better.*
